# Supplementary material
Source: PubMed Central journal article supplement (PMC3553831)

## SUPPLEMENTAL FIGURE LEGENDS

**Figure S1. Excess FliW doesnot disrupt FliS-Hag interaction.** Protein pull-down assay using the indicated amounts of His-Hag (gray caret) loaded onto a nickel column with the indicated amounts of FliS (black caret) and/or FliW proteins (open caret) added. Gel was stained with Coomassie Brilliant blue. “Supernatant” indicates the proteins that failed to bind to the beads, and “pellet” indicates the proteins that remained bound to the beads following a series of washes.

**Figure S2. FliS is required for swimming motility.** Qualitative swim expansion assays were done for WT (DK374), *hag* (DK378), *fliS* (DK397), *fliW* (DK377), *fliS csrA* (DK396), *fliWcsrA* (DK376), *csrA* (DK375). Each plate is representative of three replicates.

**Supplemental Table S1: Plasmids**

| Plasmid  | Genotype                                            | Reference |
|----------|-----------------------------------------------------|-----------|
| pDP362   | $\Omega\Delta fliD$ <i>mls amp</i>                  |           |
| pDP363   | $\Omega\Delta fliS$ <i>mls amp</i>                  |           |
| pDR111   | <i>amyE::P<sub>hyspank</sub> spec amp</i>           | (31)      |
| pJP4     | <i>P<sub>T7</sub>-His<sub>6</sub>-Hag amp</i>       |           |
| pMiniMAD | <i>ori<sup>BsTs</sup> mls</i>                       | (30)      |
| pSM6     | <i>P<sub>T7</sub>-GST-CsrA amp</i>                  | (23)      |
| pSM12    | <i>P<sub>T7</sub>-His<sub>6</sub>-SUMO-FliW amp</i> | (23)      |
| pSM25    | <i>P<sub>T7</sub>-His<sub>6</sub>-SUMO-FliS amp</i> |           |
| pSM36    | $\Omega\Delta fliDfliS$ <i>mls amp</i>              |           |
| pSM56    | <i>P<sub>T7</sub>-His<sub>6</sub>-SUMO-Hag amp</i>  |           |
| pTB146   | <i>PT<sub>7</sub>-His<sub>6</sub>-SUMO amp</i>      | (33)      |

**Supplemental Table S2: Primers**

| Primer | Sequence                                 |
|--------|------------------------------------------|
| 575    | aggagggatccctagttttatcgcgaaaataaacga     |
| 576    | ctcctgctgacaccctcagctgttggataagaga       |
| 577    | aggaggtcgacaatcgctagagcacacaattaacaa     |
| 578    | ctcctccatggagatgaactgccaaggttccaaaa      |
| 2537   | aggaggaattcacaacctgttgggatcgta           |
| 2538   | ctcctctcgagagacatattaatcttgaattcttt      |
| 2539   | aggagctcgagaaccgctattattcaaaattcag       |
| 2540   | ctcctggatcctccgctcactttgaatggct          |
| 2541   | aggaggaattcgataaagaggtagagctctgg         |
| 2542   | ctcctctcgagctgataggctgtatatggatt         |
| 2543   | aggagctcgaggcttggaaacaagccattcaa         |
| 2544   | ctcctggatccataatgaagagaagtgttgaatg       |
| 2769   | aggaggctcttcaggatggcgatccaaaatccatatacag |
| 2770   | ctcctctcgagcatcgcttccggcgattttgta        |
| 2906   | aggagaagcttgcgtcctatttatcacagcttct       |
| 2907   | ctcctgctagccatcgcttccggcgattttg          |
| 3317   | aggaggtcgaccaatgagaattaaccacaatattgc     |
| 3331   | ctcctggatccggcaacgccaaggtctttttaaaa      |

**Supplemental Table S3:  $\beta$ -galactosidase activities for Fig 3A and Fig 3B.**

| Genotype         | <i>amyE::P<sub>hag</sub><sup>translational</sup>-lacZ</i> | <i>amyE::P<sub>hag</sub><sup>transcriptional</sup>-lacZ</i> |
|------------------|-----------------------------------------------------------|-------------------------------------------------------------|
| Wild type        | 6133 $\pm$ 468 (DS278)                                    | 462 $\pm$ 93 (DS793)                                        |
| <i>csrA</i>      | 5275 $\pm$ 822 (DS7596)                                   | 466 $\pm$ 80 (DS8323)                                       |
| <i>hag</i>       | 7109 $\pm$ 362 (DS8622)                                   | 493 $\pm$ 28 (DS9904)                                       |
| <i>fliW</i>      | 738 $\pm$ 11 (DS7598)                                     | 800 $\pm$ 281 (DS8325)                                      |
| <i>fliW csrA</i> | 6003 $\pm$ 982 (DS7597)                                   | 808 $\pm$ 68 (DS8324)                                       |
| <i>fliW hag</i>  | 427 $\pm$ 33 (DK72)                                       | 698 $\pm$ 51 (DK85)                                         |
| <i>fliS</i>      | 669 $\pm$ 35 (DS7814)                                     | 969 $\pm$ 58 (DS8525)                                       |
| <i>fliS csrA</i> | 5439 $\pm$ 77 (DS8526)                                    | 429 $\pm$ 48 (DS8527)                                       |
| <i>fliS hag</i>  | 3848 $\pm$ 98 (DS9902)                                    | 243 $\pm$ 59 (DS9905)                                       |

Figure S1

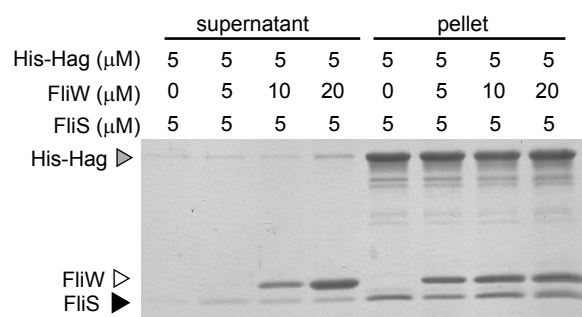

Figure S2

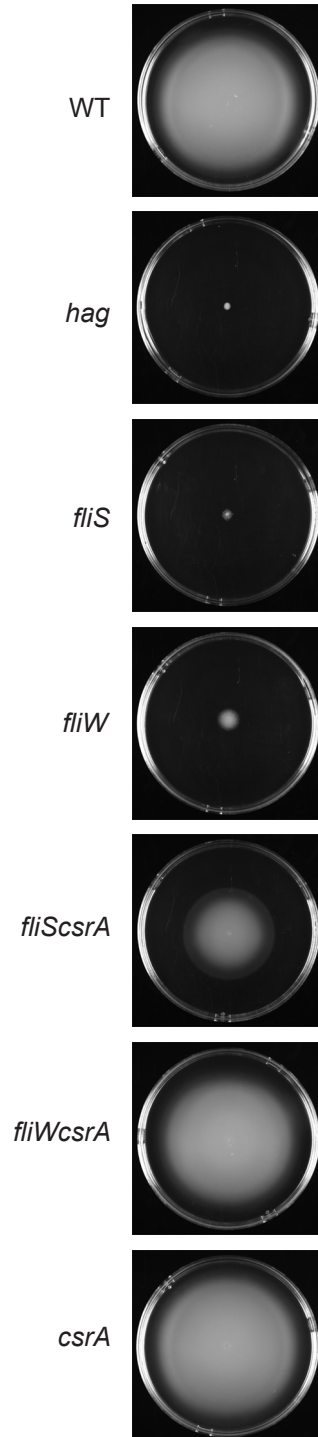

Supplement: JB.01654-12_zjb999092370so1.pdf [file JB.01654-12_zjb999092370so1.pdf]
